# Supplementary material for: Adaptive Neuro-Fuzzy Determination of the Effect of Experimental Parameters on Vehicle Agent Speed Relative to Vehicle Intruder
Source: PLOS journal article supplement (doi:10.1371/journal.pone.0155697), 2016-05-24
Supplement: S8 (10.1371/journal.pone.0155697.s008) [file journal.pone.0155697.s008]

## Sheet: Sheet1
Agent ID	Intruder ID	Intruder Front sensors active	Intruder Rear sensors active	Agent Front sensors active	Agent Rear sensors active	RSSI signal intensity/strength	Elapsed time (s)	Distance between Agent and Intruder (m)	Angle of Agent relative to Intruder	Altitude difference between Agent and Intruder	Agent speed relative to Intruder
48	52	1	0	1	0	305	23833	1039.22	-177	103	8.8
48	52	1	0	1	0	246	53439	318.786	116	-11	0.1
48	52	1	0	0	1	258	1395	219.428	-10	4	0.3
48	52	1	0	0	1	303	1502	92.8665	-17	-4	1.9
48	52	1	0	1	0	143	1604	45.5403	-23	-6	0
48	52	1	0	0	1	272	2126	362.633	54	-3	0
48	52	1	0	0	1	128	2218	51.4762	6	1	0
48	52	1	0	1	0	138	2312	53.1507	6	-1	0.1
48	52	1	0	0	1	304	2933	276.821	151	-12	10.6
48	52	1	0	0	1	306	4943	205.472	-22	-16	0.1
48	52	1	0	1	0	238	5030	56.0001	-4	-19	0.1
48	52	1	0	0	1	184	5115	61.1582	-4	-19	0.1
48	52	1	0	1	0	238	5199	59.6986	-4	-20	0.1
48	52	1	0	0	1	181	5274	59.5814	-4	-20	0.1
48	52	1	0	0	1	179	5359	59.6235	-4	-18	0.1
48	52	1	0	1	0	231	5435	59.6986	-4	-14	0.1
48	52	1	0	0	1	178	5517	57.4604	-4	-9	0.1
48	52	1	0	1	0	230	5596	55.2014	-4	-14	0.1
48	52	1	0	1	0	233	5688	54.1853	-4	-17	0.1
48	52	1	0	0	1	179	5770	56.5447	-4	-16	0.1
48	52	1	0	0	1	179	5858	56.9724	-4	-8	0.1
48	52	1	0	1	0	226	5938	55.2015	-4	-10	0
48	52	1	0	1	0	206	6026	47.9552	-1	-9	0
48	52	1	0	0	1	156	6108	39.4088	1	-6	0.1
48	52	1	0	0	1	275	6204	48.5412	0	-8	0.2
48	52	1	0	0	1	304	6295	48.9902	0	-4	0
48	52	1	0	1	0	304	6777	707.949	87	7	0
48	52	1	0	0	1	218	6896	39.684	-29	8	0.1
48	52	1	0	0	1	294	7010	603.559	111	0	12
48	52	1	0	1	0	185	9476	185.719	161	1	3.5
48	52	1	0	0	1	201	9570	50.5914	-9	2	0
48	52	1	0	0	1	183	9657	51.4762	-9	-3	0.1
48	52	1	0	0	1	300	9749	252.436	135	0	9
48	52	1	0	0	1	277	11743	50.6388	-145	1	0.5
48	52	1	0	1	0	207	18989	90.8309	-89	7	0
48	52	1	0	1	0	241	19201	51.6849	-5	13	0
48	52	1	0	1	0	242	19375	59.3811	-5	-19	0
48	52	1	0	1	0	238	19592	52.1323	-5	11	0
48	52	1	0	1	0	246	19808	51.0398	-5	21	0
48	52	1	0	1	0	242	19998	50.3607	-5	15	0
48	52	1	0	1	0	244	20181	47.1059	-5	25	0
48	52	1	0	1	0	246	20374	51.7816	-5	3	0
48	52	1	0	1	0	238	20567	51.5004	-5	4	0
48	52	1	0	1	0	240	20797	56.4681	-5	1	0
48	52	1	0	1	0	245	20988	59.9817	-5	0	0
48	52	1	0	1	0	239	21180	58.6451	-5	6	0
48	52	1	0	1	0	244	21347	58.7185	-5	7	0
48	52	1	0	1	0	242	21535	53.9281	-5	9	0
48	52	1	0	1	0	242	21740	56.8747	-5	3	0
48	52	1	0	1	0	244	21913	60.1801	-5	5	0
48	52	1	0	1	0	246	22093	59.9817	-5	4	0
48	52	1	0	1	0	253	22278	59.9817	-5	3	0
48	52	1	0	1	0	246	22439	56.8536	-5	2	0
48	52	1	0	1	0	244	22649	57.1948	-5	5	0
48	52	1	0	1	0	262	22843	58.6451	-5	4	0
48	52	1	0	1	0	241	23017	58.9734	-5	6	0
48	52	1	0	1	0	251	23224	59.1068	-5	6	0
48	52	1	0	1	0	245	23439	59.1068	-5	9	0
48	52	1	0	0	1	319	23614	86.4974	118	-3	0
48	52	1	0	1	0	198	23817	106.743	116	4	0.1
48	52	1	0	0	1	280	23907	108.182	116	12	0
48	52	1	0	1	0	263	24404	83.58	-57	7	6.7
48	52	1	0	1	0	82	24568	26.0755	178	21	0
48	52	1	0	1	0	185	25615	77.9241	-51	-12	0
48	52	1	0	1	0	193	26235	77.4257	-177	10	11.3
48	52	1	0	1	0	164	26703	76.3757	-82	-10	0
48	52	1	0	0	1	265	26795	79.646	-82	-9	0
48	52	1	0	0	1	303	26884	134.113	176	-5	3.8
48	52	1	0	0	1	164	28422	114.356	44	3	0.1
48	52	1	0	1	0	301	28508	120.452	40	2	0
48	52	1	0	0	1	208	28610	121.676	78	-2	1.5
48	52	1	0	1	0	283	28781	119.463	-34	-3	1.4
48	52	1	0	1	0	180	28908	116.554	54	4	0
48	52	1	0	1	0	162	29513	74.5767	-60	3	0.1
48	52	1	0	0	1	319	30962	289.735	36	-4	0
48	52	0	1	0	1	311	31047	146.526	152	-4	10.5
48	52	1	0	1	0	117	33554	42.9377	-161	3	0.1
48	52	1	0	1	0	129	33656	56.1806	51	-6	0
48	52	1	0	0	1	272	33745	41.1637	-166	-6	3.5
48	52	1	0	1	0	220	34544	172.531	9	-1	0
48	52	1	0	1	0	170	34627	60.3697	14	-4	0
48	52	1	0	0	1	311	35055	164.423	95	-14	0
48	52	0	1	1	0	304	36649	43.59	5	2	2.6
48	52	1	0	0	1	280	37277	61.551	168	-7	5.7
48	52	1	0	0	1	287	37843	68.7346	-72	1	2.4
48	52	1	0	0	1	306	37932	65.2871	-50	0	0
48	52	1	0	0	1	236	38030	67.7434	-50	-3	0
48	52	0	1	1	0	295	38884	39.186	-3	-1	0
48	52	1	0	1	0	169	38995	38.899	46	0	0.2
48	52	1	0	0	1	301	39079	43.0768	2	-1	0
48	52	0	1	1	0	316	39170	146.759	-32	-2	4.3
48	52	0	1	1	0	289	39959	50.58	-82	-5	0
48	52	1	0	1	0	177	40032	52.1463	-82	-9	0
48	52	0	1	1	0	284	40107	54.7486	-82	-16	0
48	52	1	0	1	0	203	40191	54.1133	-82	-17	0
48	52	1	0	1	0	183	40292	56.3529	-82	-20	0
48	52	1	0	0	1	305	40388	76.8731	-56	-20	0
48	52	1	0	0	1	302	40477	46.2127	-4	-18	0.7
48	52	1	0	1	0	280	40996	218.828	-153	-4	6.2
48	52	1	0	1	0	309	41580	79.2124	-6	-6	0
48	52	1	0	1	0	163	41690	117.17	-44	-6	0
48	52	1	0	1	0	129	41778	32.2895	-168	-4	1.5
48	52	1	0	1	0	142	42561	37.4318	-4	3	1.3
48	52	1	0	1	0	148	42643	36.9509	-2	1	0
48	52	1	0	1	0	231	43473	318.959	36	6	9.3
48	52	1	0	1	0	132	43594	33.0492	20	2	0
48	52	1	0	1	0	199	44083	46.9438	158	1	5
48	52	0	1	1	0	306	44473	24.4364	-140	4	0.1
48	52	1	0	0	1	286	45330	29.7379	36	-6	0.9
48	52	1	0	1	0	312	45432	289.307	163	0	1.9
48	52	1	0	1	0	246	48012	155.603	-90	-10	5.7
48	52	1	0	0	1	290	48207	76.2839	-21	-1	0
48	52	1	0	1	0	207	48312	67.217	164	6	0
48	52	1	0	1	0	171	48576	89.6389	-15	9	2.9
48	52	1	0	1	0	192	48685	104.56	29	7	0
48	52	1	0	1	0	253	49018	121.01	-47	0	0.1
48	52	1	0	1	0	246	49105	120.736	-47	-2	0
48	52	1	0	0	1	210	49198	65.1565	179	1	0.5
48	52	1	0	1	0	274	49495	109.415	43	3	1.6
48	52	1	0	0	1	303	49609	110.277	25	4	0
48	52	1	0	1	0	162	49934	128.636	-51	1	0.1
48	52	1	0	1	0	168	50064	30.7156	167	-1	0
48	52	1	0	1	0	296	50354	84.1656	24	11	0
48	52	1	0	1	0	234	50446	82.2426	24	11	0
48	52	1	0	1	0	297	50531	83.377	24	10	0
48	52	1	0	0	1	188	50635	83.7237	24	12	0
48	52	1	0	1	0	313	50713	85.6461	24	14	0
48	52	1	0	1	0	182	50809	92.4689	-13	9	0.1
48	52	1	0	0	1	260	50902	67.7703	2	3	0
48	52	1	0	1	0	291	51938	35.6787	-28	-1	0
48	52	1	0	1	0	286	52126	34.6113	-28	1	0
48	52	0	1	1	0	291	52262	22.6808	68	5	1
48	52	1	0	1	0	99	52331	18.4878	68	3	0
48	52	1	0	1	0	291	53823	145.8	34	29	0
48	52	1	0	1	0	170	54256	83.8021	-37	6	1.9
48	52	1	0	0	1	270	54355	56.376	5	21	0
48	52	0	1	0	1	317	54452	92.2467	165	3	7.9
48	52	1	0	1	0	209	55039	161.025	15	4	0
48	52	1	0	0	1	178	55104	40.1639	-23	4	0
48	52	1	0	1	0	158	55163	37.8937	-23	4	0
48	52	1	0	0	1	182	55239	35.4938	-23	2	0
48	52	1	0	1	0	181	55319	35.7946	-23	4	0
48	52	1	0	0	1	163	55412	29.0842	146	1	4.3
48	52	1	0	1	0	298	57379	394.539	-164	12	8.6
48	52	1	0	0	1	241	58701	100.014	-16	5	0
48	52	1	0	1	0	301	59521	431.953	-133	7	6.5
48	52	1	0	1	0	182	61290	140.126	6	-4	6.3
48	52	1	0	0	1	304	63205	431.157	51	12	0
48	52	1	0	0	1	200	64109	164.293	31	13	0
48	52	1	0	0	1	291	64840	122.442	170	2	10.1
48	52	1	0	1	0	276	65722	52.2522	-4	13	0
48	52	1	0	0	1	149	65816	60.8067	46	16	1.6
48	52	1	0	1	0	187	65897	79.811	1	10	1.1
48	52	1	0	1	0	180	66015	77.4801	33	-3	0
48	52	1	0	0	1	279	66105	78.6848	33	-2	0
48	52	1	0	0	1	167	66213	403.753	-159	3	4.1
48	52	1	0	1	0	116	66463	28.4028	43	9	2.6
48	52	1	0	1	0	171	67147	156.17	-18	10	9.1
48	52	1	0	0	1	258	69828	450.668	-175	4	6.8
48	52	0	1	0	1	281	71736	127.467	179	3	5.2
48	52	1	0	0	1	336	73053	982.148	68	-20	10.8
48	52	1	0	1	0	317	73650	118.203	70	7	4.3
48	52	1	0	0	1	218	73736	54.9181	-40	-9	0
48	52	1	0	0	1	194	73826	54.5835	-40	-11	0
48	52	1	0	1	0	311	73928	470.336	-133	-4	4.9
48	52	1	0	0	1	250	74518	513.102	98	7	9.9
48	52	0	1	0	1	296	76107	117.986	-177	-19	10.4
48	52	1	0	1	0	143	77280	53.3608	-12	10	0.3
48	52	1	0	0	1	243	77368	52.8417	-12	3	0
48	52	1	0	0	1	268	77462	129.142	169	3	8.6
48	52	1	0	1	0	154	78072	20.0062	8	1	0.1
48	52	1	0	0	1	290	78174	14.8003	3	-3	0
48	52	1	0	1	0	76	78283	13.5945	3	-2	0
48	52	1	0	1	0	79	78368	13.1107	3	-5	0.1
48	52	1	0	1	0	181	78443	38.6638	-164	-1	1.1
48	52	1	0	1	0	127	78523	63.0825	-99	2	0.2
48	52	1	0	1	0	142	78615	57.8402	-99	-6	0
48	52	1	0	0	1	53	78692	66.4032	103	1	5
48	52	1	0	0	1	292	79569	30.5473	-37	3	0
48	52	1	0	0	1	233	80251	57.7195	38	-5	9.8
48	52	1	0	1	0	272	80348	97.58	26	-2	7.6
48	52	1	0	0	1	181	80446	52.9049	31	0	0
48	52	1	0	1	0	168	80541	69.8619	141	1	2.5
48	52	0	1	1	0	283	80599	36.4664	-37	3	0.1
48	52	0	1	1	0	287	80660	33.4516	-37	12	0.1
48	52	1	0	0	1	238	80729	32.6497	-37	12	0.1
48	52	0	1	1	0	284	80794	31.7177	-37	10	0.1
48	52	1	0	0	1	217	80872	179.238	160	5	8.5
48	52	1	0	1	0	234	82847	277.367	-174	-7	6.7
48	52	1	0	1	0	236	83105	300.974	-115	2	0
48	52	1	0	1	0	268	232	335.435	151	6	11.8
48	52	1	0	0	1	307	1461	77.0276	-168	-5	0.3
48	52	1	0	1	0	134	1568	46.3876	-23	-6	0
48	52	1	0	1	0	309	1687	443.995	-127	11	4.3
48	52	1	0	1	0	142	2185	51.3931	6	0	0
48	52	1	0	1	0	141	2286	51.8093	6	0	0
48	52	1	0	0	1	305	2407	425.376	92	-9	11.8
48	52	1	0	0	1	245	3681	199.537	-146	-7	9
48	52	1	0	0	1	180	5002	56.0601	-4	-18	0.1
48	52	1	0	0	1	178	5080	59.9604	-4	-17	0.1
48	52	1	0	0	1	179	5167	59.4798	-4	-20	0.1
48	52	1	0	1	0	229	5245	61.2772	-4	-21	0.1
48	52	1	0	0	1	180	5328	59.4348	-4	-20	0.1
48	52	1	0	1	0	227	5408	59.5068	-4	-15	0.1
48	52	1	0	1	0	229	5493	59.3283	-4	-11	0.1
48	52	0	1	0	1	308	5567	56.9724	-4	-8	0.1
48	52	1	0	1	0	232	5657	52.6849	-4	-16	0.1
48	52	1	0	1	0	229	5745	56.6646	-4	-17	0.1
48	52	1	0	0	1	179	5823	56.8507	-4	-12	0.1
48	52	1	0	1	0	232	5910	55.1044	-4	-7	0.1
48	52	1	0	0	1	169	6001	90.1112	-5	-11	1.6
48	52	1	0	1	0	188	6085	39.8323	1	-4	0
48	52	1	0	1	0	153	6168	56.2773	148	-6	2.6
48	52	1	0	0	1	281	6256	48.9902	0	-4	0
48	52	1	0	0	1	155	6347	28.3214	178	1	7.1
48	52	1	0	0	1	311	6861	161.317	13	7	0
48	52	1	0	0	1	272	6960	195.125	83	8	11.5
48	52	1	0	1	0	300	9430	438.421	111	12	0
48	52	1	0	0	1	204	9532	52.8545	-9	3	0
48	52	1	0	0	1	180	9624	50.1791	-9	1	0
48	52	1	0	1	0	239	9711	46.0001	148	-4	1.5
48	52	1	0	1	0	239	11686	404.426	-89	-4	10.4
48	52	1	0	1	0	308	15297	135.374	164	9	12.4
48	52	1	0	1	0	245	19139	51.8062	-5	16	0
48	52	1	0	1	0	245	19310	53.2245	-5	5	0
48	52	1	0	1	0	244	19495	56.364	-5	-7	0
48	52	1	0	1	0	243	19728	49.5219	-5	28	0
48	52	1	0	1	0	242	19934	52.1426	-5	11	0
48	52	1	0	1	0	243	20110	47.088	-5	20	0
48	52	1	0	1	0	238	20316	54.8075	-5	-6	0
48	52	1	0	1	0	236	20492	48.6532	-5	12	0
48	52	1	0	1	0	240	20738	56.3649	-5	2	0
48	52	1	0	1	0	243	20931	59.9817	-5	-1	0
48	52	1	0	1	0	239	21110	60.1801	-5	3	0
48	52	1	0	1	0	244	21291	58.9734	-5	9	0
48	52	1	0	1	0	243	21468	57.4443	-5	10	0
48	52	1	0	1	0	236	21656	52.1426	-5	6	0
48	52	1	0	1	0	242	21846	58.7433	-5	8	0
48	52	1	0	1	0	248	22036	60.0683	-5	4	0
48	52	1	0	1	0	246	22204	59.877	-5	0	0
48	52	1	0	1	0	243	22382	58.6233	-5	3	0
48	52	1	0	1	0	254	22577	57.1948	-5	7	0
48	52	1	0	1	0	246	22772	58.8695	-5	4	0
48	52	1	0	1	0	267	22948	58.7433	-5	3	0
48	52	1	0	1	0	232	23154	58.9734	-5	4	0
48	52	1	0	1	0	269	23348	57.8176	-5	9	0
48	52	1	0	1	0	297	23551	88.0416	118	4	0
48	52	1	0	1	0	237	23778	107.702	152	4	1.7
48	52	1	0	1	0	184	23881	108.584	116	10	0
48	52	0	1	0	1	296	23957	80.3389	-77	10	11.1
48	52	1	0	1	0	185	24515	71.222	-56	18	0
48	52	1	0	1	0	308	25561	106.362	-51	-4	0
48	52	1	0	1	0	188	25725	75.4936	-51	-13	0.1
48	52	1	0	0	1	259	26662	71.5336	-82	-8	0
48	52	1	0	0	1	258	26755	80.0083	-82	-11	0
48	52	1	0	1	0	165	26855	77.3104	-82	-8	0
48	52	1	0	1	0	294	28384	117.921	-65	7	3.5
48	52	1	0	1	0	304	28473	118.893	40	3	0
48	52	1	0	1	0	311	28556	118.569	40	1	0
48	52	1	0	1	0	302	28711	124.406	78	0	0.1
48	52	1	0	0	1	300	28867	117.821	54	4	0
48	52	1	0	0	1	305	28976	127.653	-172	14	11.6
48	52	1	0	1	0	234	30396	277.85	-158	4	11.1
48	52	1	0	1	0	132	31022	47.1123	-125	-6	1.4
48	52	1	0	0	1	325	33511	212.646	4	1	0
48	52	1	0	0	1	296	33622	54.743	51	-4	0.1
48	52	1	0	1	0	128	33705	57.862	51	-5	0
48	52	1	0	1	0	212	34120	32.4376	169	3	11.7
48	52	1	0	0	1	241	34593	58.5191	14	-3	0
48	52	1	0	0	1	271	34699	221.612	-164	-5	9.7
48	52	1	0	0	1	306	36277	47.7323	-176	-3	3.4
48	52	1	0	1	0	211	36718	33.64	176	10	0.1
48	52	1	0	1	0	142	37814	54.685	-15	1	3.4
48	52	1	0	1	0	126	37904	65.2871	-50	0	0
48	52	1	0	0	1	282	37999	67.3411	-50	-5	0
48	52	0	1	0	1	241	38518	111.466	177	12	3.4
48	52	0	1	1	0	317	38957	40.4254	145	0	3.9
48	52	1	0	1	0	160	39042	43.0768	2	-1	0
48	52	1	0	0	1	293	39137	42.9795	2	-2	0
48	52	0	1	1	0	287	39933	47.654	-82	-3	0
48	52	1	0	1	0	197	40007	50.8044	-82	-7	0
48	52	0	1	1	0	289	40083	54.5619	-82	-13	0
48	52	0	1	1	0	285	40162	54.3369	-82	-17	0
48	52	0	1	1	0	285	40264	55.8596	-82	-16	0
48	52	1	0	1	0	126	40349	61.8412	-13	-18	0
48	52	1	0	0	1	306	40451	74.6244	-54	-22	1.8
48	52	0	1	1	0	321	40538	39.2445	-136	-11	1.3
48	52	1	0	1	0	312	41487	49.2441	-6	-4	0
48	52	1	0	1	0	163	41656	117.2	-44	-5	0
48	52	1	0	1	0	161	41736	116.985	-44	-5	0
48	52	1	0	1	0	298	42498	525.756	9	14	6.6
48	52	1	0	0	1	289	42611	36.5548	-2	1	0
48	52	1	0	0	1	172	43107	74.2256	175	5	7.7
48	52	1	0	1	0	133	43561	29.6441	20	8	0
48	52	1	0	0	1	195	43649	26.2498	-143	3	0
48	52	1	0	0	1	294	44449	25.7992	48	-1	0.8
48	52	1	0	1	0	308	45267	470.478	9	7	8.6
48	52	0	1	1	0	333	45374	32.1599	-146	-4	0
48	52	1	0	0	1	304	46235	203.376	171	1	7.7
48	52	1	0	0	1	280	48170	76.1137	-21	-2	0
48	52	1	0	1	0	279	48271	77.0876	-21	2	0
48	52	1	0	1	0	298	48546	93.6092	67	8	0.5
48	52	1	0	1	0	193	48646	104.941	29	5	0
48	52	1	0	0	1	313	48792	496.139	-139	17	4.5
48	52	1	0	0	1	309	49078	121.358	-47	-2	0.1
48	52	1	0	1	0	230	49157	120.651	-47	0	0.1
48	52	1	0	1	0	283	49453	107.753	43	5	1.6
48	52	1	0	0	1	309	49566	109.181	25	3	0
48	52	1	0	1	0	232	49875	95.6949	-177	0	0
48	52	1	0	1	0	164	50031	102.059	-45	0	2.5
48	52	1	0	1	0	282	50315	81.6613	36	11	0.5
48	52	1	0	0	1	188	50412	82.4219	24	11	0
48	52	1	0	1	0	253	50502	81.8013	24	12	0
48	52	1	0	1	0	246	50592	82.0207	24	13	0
48	52	1	0	1	0	257	50685	85.3816	24	12	0
48	52	1	0	0	1	234	50778	90.6164	129	13	4.5
48	52	1	0	0	1	302	50873	68.0438	-10	3	0
48	52	1	0	0	1	154	50969	29.3084	-170	9	6.5
48	52	1	0	1	0	294	52049	40.8574	-28	3	0
48	52	1	0	0	1	311	52233	65.5867	13	8	1.8
48	52	1	0	1	0	104	52306	20.4463	68	3	0
48	52	1	0	0	1	213	52386	23.8663	-118	0	0
48	52	1	0	0	1	304	53977	502.183	-162	7	10.7
48	52	1	0	1	0	126	54320	54.7028	5	21	0
48	52	1	0	1	0	125	54421	57.9669	5	11	0.1
48	52	1	0	0	1	286	55006	369.303	45	2	1.4
48	52	0	1	0	1	290	55083	40.0245	-23	4	0
48	52	0	1	0	1	297	55142	39.3406	-23	4	0
48	52	1	0	1	0	150	55206	38.2685	-23	3	0
48	52	1	0	1	0	181	55294	35.4189	-23	3	0
48	52	1	0	1	0	153	55373	37.1711	-23	1	0
48	52	1	0	0	1	295	55652	1259.55	129	26	6.9
48	52	1	0	1	0	290	58664	380.137	71	-1	0
48	52	1	0	1	0	257	58750	209.124	-153	4	9.4
48	52	1	0	1	0	258	61231	456.348	-74	-17	9.9
48	52	1	0	0	1	224	61385	175.258	-152	-24	0
48	52	1	0	1	0	273	64057	454.216	93	13	0
48	52	1	0	1	0	295	64217	126.172	-178	12	0
48	52	1	0	1	0	280	65690	53.3622	-4	6	0.1
48	52	1	0	1	0	289	65784	61.2955	-1	14	1.7
48	52	1	0	0	1	294	65865	78.5367	1	10	1.1
48	52	1	0	1	0	182	65964	77.1812	33	-6	0.1
48	52	1	0	0	1	275	66069	78.9087	33	-6	0.1
48	52	1	0	0	1	218	66171	45.0201	-173	-2	6.9
48	52	1	0	1	0	193	66428	61.1308	4	7	2.7
48	52	1	0	1	0	325	67078	532.614	-90	-2	10.5
48	52	1	0	0	1	131	68032	45.8852	-180	4	6.5
48	52	0	1	0	1	230	71354	85.1279	-164	-3	12.5
48	52	1	0	1	0	265	72969	356.448	144	-1	5.6
48	52	1	0	1	0	321	73614	205.923	-4	-2	9.8
48	52	1	0	1	0	91	73710	54.3493	-40	-6	0
48	52	1	0	1	0	90	73794	54.5551	-40	-11	0
48	52	0	1	0	1	289	73880	76.829	164	-20	7.3
48	52	1	0	1	0	257	74449	186.427	-152	0	6.3
48	52	1	0	1	0	183	75648	66.7283	179	6	10.4
48	52	1	0	1	0	120	77248	55.2953	-10	11	2.9
48	52	1	0	1	0	149	77339	52.8417	-12	3	0
48	52	1	0	0	1	283	77428	52.6772	-12	2	0
48	52	1	0	1	0	130	78031	56.2346	22	6	1.4
48	52	1	0	0	1	268	78132	16.4939	3	1	0
48	52	1	0	0	1	221	78243	13.6066	3	-2	0
48	52	1	0	1	0	77	78340	14.4886	3	-4	0
48	52	1	0	0	1	188	78414	53.4551	-103	-6	4.3
48	52	1	0	0	1	165	78492	62.6899	-99	3	0.2
48	52	1	0	0	1	182	78580	59.2409	-99	0	0.1
48	52	1	0	1	0	200	78662	50.3838	80	-3	0
48	52	1	0	1	0	303	79516	297.234	-15	3	0
48	52	1	0	0	1	253	79630	234.702	161	-3	9.2
48	52	1	0	1	0	298	80319	74.7659	3	0	7.1
48	52	1	0	0	1	155	80399	99.7409	-9	2	6.4
48	52	1	0	1	0	245	80502	54.1366	31	0	0.1
48	52	0	1	1	0	284	80579	36.4664	-37	3	0.1
48	52	0	1	1	0	286	80641	33.4516	-37	12	0.1
48	52	0	1	1	0	277	80705	32.6497	-37	12	0.1
48	52	1	0	1	0	63	80770	31.8529	-37	10	0.1
48	52	1	0	0	1	211	80835	31.4396	-37	8	0.1
48	52	1	0	1	0	290	82769	701.074	116	-1	10.6
48	52	1	0	1	0	266	83040	311.546	-111	1	1.5
48	52	1	0	1	0	237	83219	301.124	-115	-5	0
