# Supplementary material for: Adaptive Neuro-Fuzzy Determination of the Effect of Experimental Parameters on Vehicle Agent Speed Relative to Vehicle Intruder
Source: PLOS journal article supplement (doi:10.1371/journal.pone.0155697), 2016-05-24
Supplement: S11 (10.1371/journal.pone.0155697.s011) [file journal.pone.0155697.s011]

| **Output** | **Parameters description** |
| --- | --- |
| 1 | Vehicle agent speed relative to Vehicle intruder |
