# Supplementary material for: Adaptive Neuro-Fuzzy Determination of the Effect of Experimental Parameters on Vehicle Agent Speed Relative to Vehicle Intruder
Source: PLOS journal article supplement (doi:10.1371/journal.pone.0155697), 2016-05-24
Supplement: S13 (10.1371/journal.pone.0155697.s013) [file journal.pone.0155697.s013]

| **Influences of selected combinations of input parameters on output prediction** | **Influences of selected combinations of input parameters on output prediction** |
| --- | --- |
| 1stsample | 2ndsample |
| ANFIS model 34: in7 in8 -->trn=2.1454, chk=2.6909 | ANFIS model 31: in6 in7 -->trn=1.3513, chk=136.6236 |
| 3rdsample | 4thsample |
| ANFIS model 34: in7 in8 -->trn=1.7905, chk=9.9407 | ANFIS model 28: in5 in7 -->trn=1.6388, chk=2.7641 |
| 5thsample | 6th sample |
| ANFIS model 34: in7 in8 -->trn=2.2627, chk=3.3060 | ANFIS model 34: in7 in8 -->trn=1.6528, chk=5.4500 |
| 7thsample | 8thsample |
| ANFIS model 34: in7 in8 -->trn=2.2725, chk=2.8984 | ANFIS model 34: in7 in8 -->trn=1.8243, chk=2.3537 |
